# Supplementary material for: Hazardous 2,4,6-trinitrophenol (TNP) detection in water by amine and azine functionalized metal-organic framework
Source: Research Square preprint supplement (doi:10.21203/rs.3.rs-3231664/v1), 2023-09-01
Supplement: Supplementary file 1 [file f6a83fedb6097f36698f2207.docx]

**Supplementary Information**

**Selective and sensitive detection of hazardous 2,4,6-trinitrophenol (TNP) in water by an amine and azine functionalized metal-organic framework**

Manpreet Kaur a, Ashok Kumar Malik a,*

*a Department of Chemistry, Punjabi University, Patiala-147002, Punjab, India*

*Corresponding author: [malik_chem2002@yahoo.co.uk](mailto:malik_chem2002@yahoo.co.uk)(A.K.M.)

**Supporting Information**

HOMO LUMO energy levels of NEs/L and LOD calculations.

**Table S1**. HOMO LUMO energy levels of commonly studies nitro explosive molecules determined using theoretical calculations.

| **Sr. No.** | **Ligand/Analyte** | **EHOMO (eV)** | **ELUMO (eV)** | **ΔE (eV)** |
| --- | --- | --- | --- | --- |
| 1 | L | -7.055 | -2.805 | -4.250 |
| 2 | H2ata | -8.228 | 1.702 | -9.930 |
| 3 | 2-NP | -9.464 | -1.880 | -7.584 |
| 4 | 1,3-DNB | -8.620 | -3.316 | -5.303 |
| 5 | TNP | -8.408 | -4.051 | -4.357 |
| 6 | 2,4-DNT | -8.306 | -3.160 | -5.145 |
| 7 | 2,6-DNT | -8.100 | -3.025 | -5.075 |
| 8 | 2,4-DNP | -7.881 | -3.009 | -4.871 |
| 9 | NB | -7.823 | -2.630 | -5.192 |
| 10 | 4-NT | -7.574 | -2.509 | -5.065 |
| 11 | 2-NT | -7.489 | -2.485 | -5.003 |
| 12 | 3-NT | -7.480 | -2.556 | -4.924 |
| 13 | 4-NP | -7.142 | -2.420 | -4.721 |

**Section S1: Calculation of Limit of detection (LOD)** **for TNP**

The 22.91 mg of TNP was dissolved in 50 ml of distilled water to make a 2 mM aqueous TNP solution. This solution was used in the PL emission studies. Furthermore, 10 ml of a 2 mM aqueous TNP solution was diluted with water to achieve a 2 μM, *i.e.*, 22.91 μg TNP in 50 ml solution. This diluted 2 μM aqueous TNP solution was utilized in another set of PL emission experiments to determine LOD.


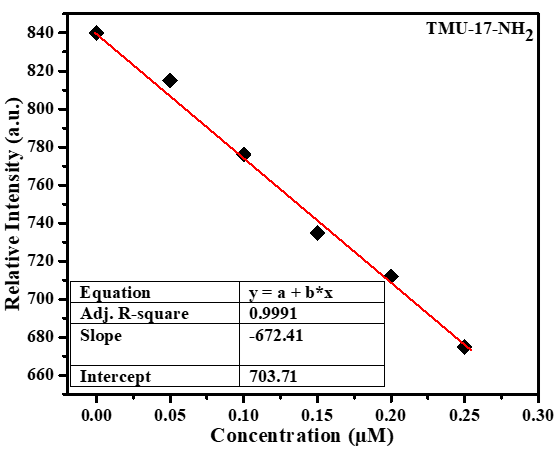


**Figure S1.** Linear region of PL emission intensity for TMU-17-NH2 in water upon incremental addition of TNP.

In a typical LOD experiment, an incremental amount of 2 μM aqueous TNP solution in the volume range of 0.0 L to 250 L was introduced to the TMU-17-NH2 water suspension (2 mg of MOF dispersed in 2 ml water). The intensity of the fluorescence recorded for each incremental addition of aqueous TNP solution was plotted against the rising concentration of TNP. The slop of the resulting curve was determined to be 672.41 µM TMU-17-NH2. The standard deviation (σ) in the TMU-17-NH2 LOD determination was derived from five blank measurements for each MOF. LOD = 3/m is determined using an earlier report S1, and the results are given below:

| **Blank Readings** | | **TMU-17-NH2** |
| --- | --- | --- |
| **#1** | Fluorescence Intensity (a.u.) | 846 |
| **#2** | Fluorescence Intensity (a.u.) | 852 |
| **#3** | Fluorescence Intensity (a.u.) | 851 |
| **#4** | Fluorescence Intensity (a.u.) | 843 |
| **#5** | Fluorescence Intensity (a.u.) | 867 |
| **Standard deviation (σ)** | | 9.257429 |
| **Slope (m)** | | 672.41 µM |
| **Detection limit (3σ/m)** | | 0.04130 µM or 9.4 ppb |


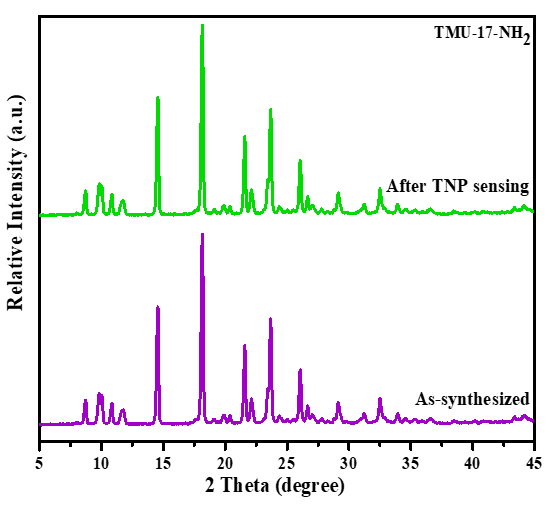


**Figure S2.** PXRD patterns of TMU-17-NH2: comparison between the as-synthesized vs. after the TNP sensing.

**References**

**S1.** B. Parmar, Y. Rachuri, K.K. Bisht, R. Laiya, E. Suresh, Mechanochemical and conventional synthesis of Zn (II)/Cd (II) luminescent coordination polymers: dual sensing probe for selective detection of chromate anions and TNP in aqueous phase, Inorganic chemistry 56(5) (2017) 2627-2638.
